# Supplementary material for: Identification of the human eosinophil lineage-committed progenitor: revision of phenotypic definition of the human common myeloid progenitor
Source: PubMed Central journal article supplement — J Exp Med. 2009 Jan 19;206(1):183–93. doi: 10.1084/jem.20081756 (PMC2626675; doi:10.1084/jem.20081756), 2009-01-19
Supplement: jem.20081756_1.pdf [file jem.20081756_1.pdf]

## SUPPLEMENTAL MATERIAL

Mori et al., <http://www.jem.org/cgi/content/full/jem.20081756/DC1>**Table S1.** Primer and probe sequences for gene-specific RT-PCR

| Gene                              | Forward primer sequence     | Reverse primer sequence        | TaqMan probe sequence (5'-FAM, 3'-TAMRA) |
|-----------------------------------|-----------------------------|--------------------------------|------------------------------------------|
| <i>GATA-1</i>                     | 5'-CTCCCTGTCCCAATAGTGC-3'   | 5'-GTCCTTCGGCTGCTCCTGTG-3'     |                                          |
| <i>GATA-2</i>                     | 5'-AGCCGGCACCTGTTGTGCAA-3'  | 5'-TGACTTCTCCTGCATGCACT-3'     |                                          |
| <i>FOG-1</i>                      | 5'-ACAGACGAGAAGCCAAAGA-3'   | 5'-AGAGGATGTCCTTGTGGTG-3'      |                                          |
| <i>C/EBP<math>\alpha</math></i>   | 5'-AAGGTGCTGGAGCTGACCAAG-3' | 5'-AATCTCCTAGTCTGGCTCG-3'      |                                          |
| <i>C/EBP<math>\epsilon</math></i> | 5'-AGTCTGGGGAAGAGCAGCTTC-3' | 5'-ACAGTGTGCCACTTGGTACTG-3'    |                                          |
| <i>PU.1</i>                       | 5'-ATGTGCCTCCAGTACCCATC-3'  | 5'-TCTTCTGGTAGGCATCTTC-3'      |                                          |
| <i>IL-3R<math>\alpha</math></i>   | 5'-CCTCCTTTGGCTCACGCTG-3'   | 5'-GGCCACTCGGACGGGTAG-3'       |                                          |
| <i>IL-5R<math>\alpha</math></i>   | 5'-ATGAAGGAAGCTGCCTGAGA-3'  | 5'-GTAATACATGCGCCACGATG-3'     |                                          |
| <i>GM-CSFR<math>\alpha</math></i> | 5'-CTTCTCTGACCAAGCA-3'      | 5'-ACATGGGTTCTGAGTC-3'         |                                          |
| <i><math>\beta c</math></i>       | 5'-AATACATCGTCTCTGTTCAG-3'  | 5'-TCACTCCAATCGTCCAGAT-3'      |                                          |
| <i>MBP</i>                        | 5'-CGTACCTCCTGGTGAGAAG-3'   | 5'-GTAGCCTCCTCGGGTACACA-3'     |                                          |
| <i>EPX</i>                        | 5'-CACGGTTTCAAGGGACATC-3'   | 5'-CTTTTCTGCCTGGGGTG-3'        |                                          |
| <i>MPO</i>                        | 5'-GTATGACGGAGGCTTCTCTC-3'  | 5'-CAGTTGACGCCAGTGACGAA-3'     |                                          |
| <i>C-L Protein</i>                | 5'-ATCAGAAGAGCCACCCAGA-3'   | 5'-GTTGATGACCACACGACGAC-3'     |                                          |
| <i>HDC</i>                        | 5'-AGTGCCTGAGAGTGCTCCTGA-3' | 5'-GCATTTTGGCAACCAGTCCAT-3'    |                                          |
| <i>GAPDH</i>                      | 5'-CCACATCGCTCAGACCCAT-3'   | 5'-GGCAACAATATCCACTTTACCAGA-3' |                                          |
| <i>GATA-1</i>                     | 5'-CCTCATCCGGCCAAAGA-3'     | 5'-TGGTCGTCTGGCAGTTGGT-3'      | 5'-CGCCTGATTGTCAGTAAACGGGCAG-3'          |
| <i>GATA-2</i>                     | 5'-ATCCAGACTCGGAACCGGA-3'   | 5'-GCACTTTGACAGCTCCTCGAA-3'    | 5'-ATGTCCAACAAGTCCAAGAAGAGCAAGAAAGG-3'   |
| <i>FOG-1</i>                      | 5'-TTGCCACCGCAGTGATCA-3'    | 5'-GCTCGTCTCGGTACCAGAT-3'      | 5'-AGACGTCTTCCCCTGCAAGGACTGTG-3'         |
| <i>C/EBP<math>\alpha</math></i>   | 5'-TGTGCTTGGAAATGCAAAC-3'   | 5'-GAGGCAGGAAACCTCCAAATAA-3'   | 5'-CACCGCTCCAATGCCTACTGAGTAGGG-3'        |
| <i>PU.1</i>                       | 5'-CGTGCAAATGGAAGGGTTT-3'   | 5'-CGTTGGTATAGATCCGTGCATAGG-3' | 5'-CCCCCTCATCAGAAGACCTGGTG-3'            |
